# Supplementary material for: Characterization of the Urinary Metagenome and Virome in Healthy Children
Source: MDPI journal article supplement (doi:10.3390/biomedicines10102412), 2022-09-27
Supplement: s1 [file s1]

**A**

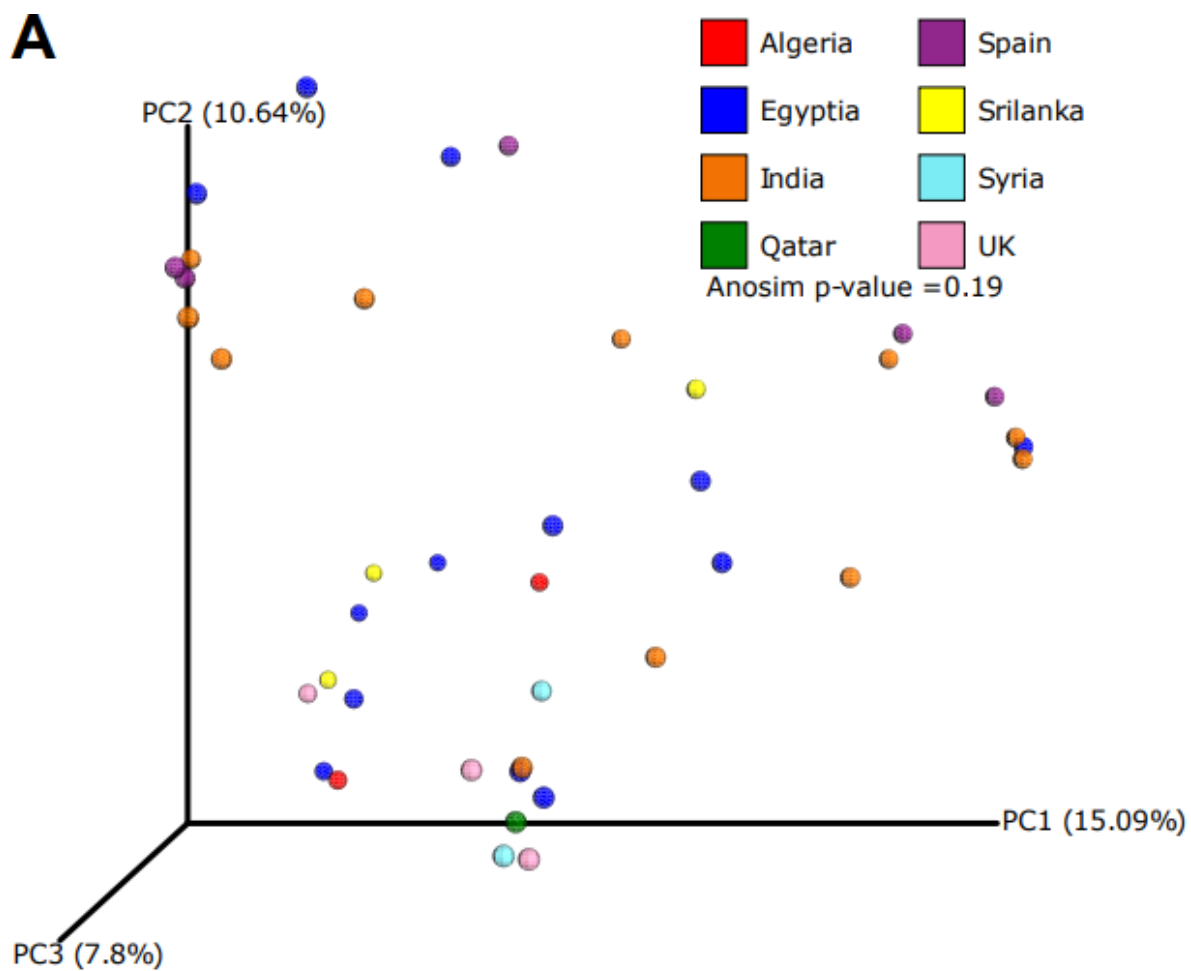

**B**

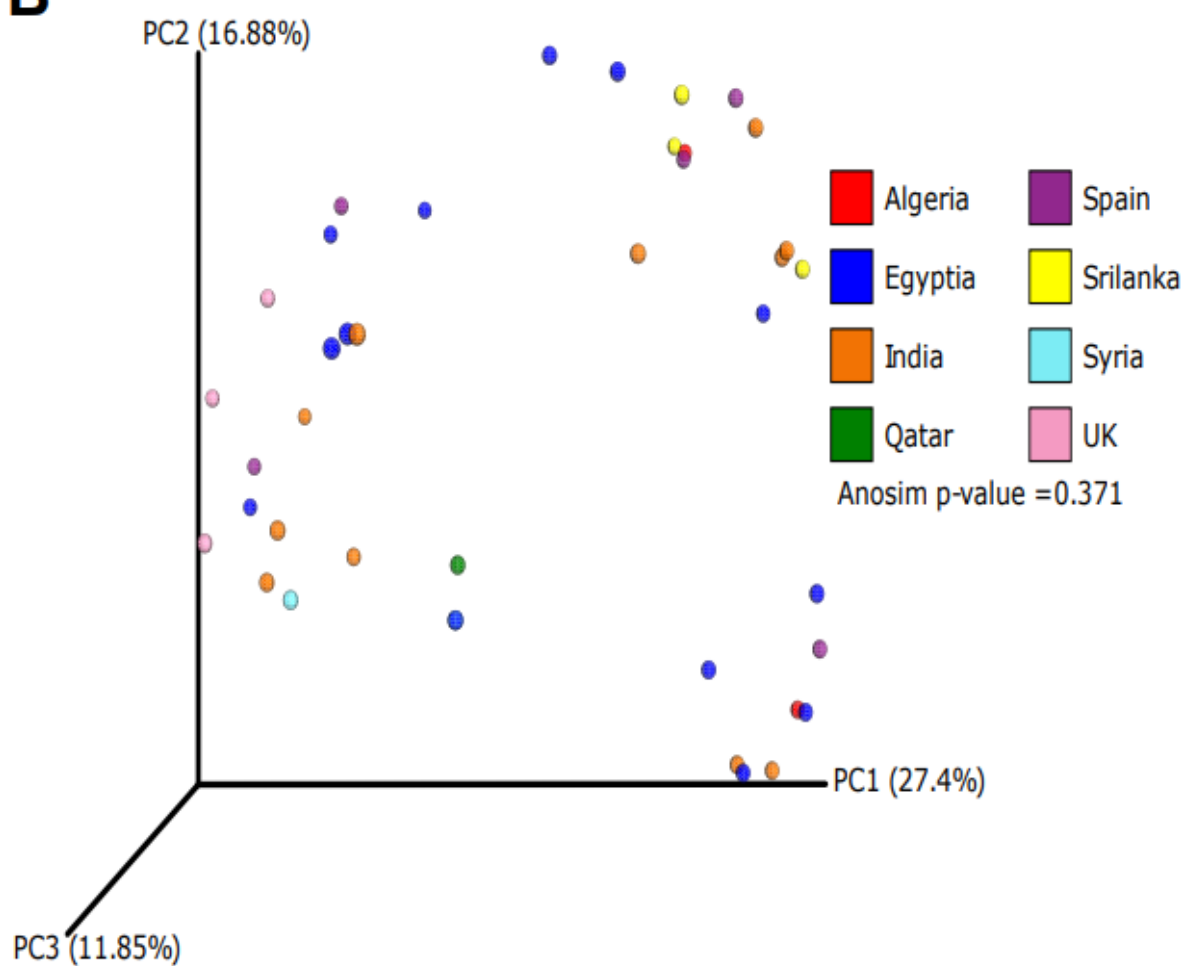

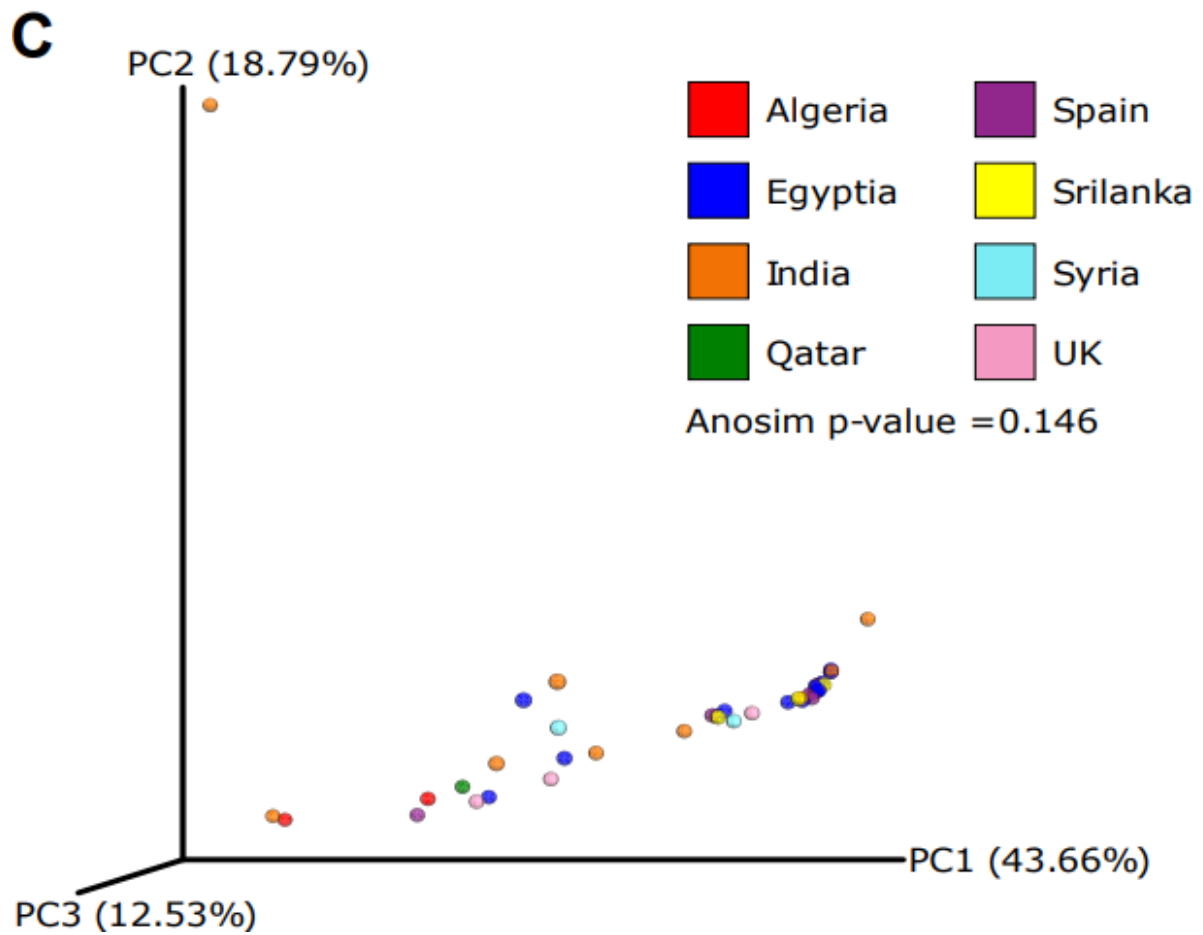

**Figure S2.** Beta diversity of the different nationalities of the healthy children. (A) beta diversity of urinary bacteriome. (B) beta diversity of urinary mycobiome. (C) beta diversity of urinary virome.
