# Supplementary material for: Characterization of the Urinary Metagenome and Virome in Healthy Children
Source: MDPI journal article supplement (doi:10.3390/biomedicines10102412), 2022-09-27
Supplement: s1 [file s1]

| Primer          | Specific Primer sequence     | Target Gene |
|-----------------|------------------------------|-------------|
| NXT-16S_V3-V4_F | CCTACGGGNGGCWGCAG            | 16s rRNA    |
| NXT-16S_V3-V4-R | GACTACHVGGGTATCTAATCC        |             |
| NXT-18S_F       | GTACACACCGCCCGTC             | 18s rRNA    |
| NXT-18S_R       | TGATCCTTCTGCAGGTTTACC<br>TAC |             |
| NXT_ITS1_F      | CTTGGTCATTTAGAGGAAGTA<br>A   | ITS2        |
| NXT_ITS2_R      | GCTGCGTTCTTCATCGATGC         |             |

**Table S1.** Primers list of bacterial and fungal marker genes. 16srRNA (bacterial marker gene), 18srRNA and ITS2 (fungal marker genes).
